# Supplementary material for: Nottingham Prognostic Index Plus: Validation of a clinical decision making tool in breast cancer in an independent series
Source: PubMed Central journal article supplement (PMC4858129; doi:10.1002/cjp2.32), 2016-01-15
Supplement: CJP2-2-32-s001.pdf [file CJP2-2-32-s001.pdf]

**Supplementary Table 1. Antibodies used in the NPI+**

| <b>Antibody</b> | <b>Supplier</b>  | <b>Clone</b>      | <b>Isotype</b> | <b>Dilution</b> | <b>Antigen Retrieval</b> |
|-----------------|------------------|-------------------|----------------|-----------------|--------------------------|
| Ck5/6           | Dako             | DS/1684           | IgG1           | 1:50            | EDTA                     |
| Ck7/8           | BD Biosciences   | CAM5.2            | IgG2a          | 1:1             | Citrate                  |
| EGFR            | Invitrogen/Zymed | 31G7              | IgG1           | 1:30            | Proteinase K             |
| ER              | Dako             | SP1               | IgG            | 1:150           | Citrate                  |
| HER2            | Dako             | Rabbit polyclonal | N/A            | 1:400           | None                     |
| HER3            | Leica            | RTJ1              | IgM            | 1:30            | Citrate                  |
| HER4            | Thermo Shandon   | Rabbit polyclonal | N/A            | 1:100           | Citrate                  |
| MUC1            | Leica            | NCL-MUC-1         | IgG1           | 1:750           | Citrate                  |
| p53             | Leica            | NCL-p53-D07       | IgG2b          | 1:50            | Citrate                  |
| PgR             | Dako             | PgR636            | IgG1           | 1:125           | Citrate                  |
